# Supplementary material for: Consideration of genetic variation and evolutionary history in future conservation of Indian one-horned rhinoceros (Rhinoceros unicornis)
Source: PubMed Central journal article supplement (PMC9301832; doi:10.1186/s12862-022-02045-2), 2022-07-20
Supplement: 12862_2022_2045_MOESM1_ESM.pdf [file 12862_2022_2045_MOESM1_ESM.pdf]

**Additional file 1 Table S1:** Details of the primers used in sequencing Indian rhino whole mitogenome and phylogeography data.

| S.No. | Primer           | Sequence                   | Ta (°C) | Amplicon | Targeted genes                                                                                                        | Polymorphic sites | Genbank accessions |
|-------|------------------|----------------------------|---------|----------|-----------------------------------------------------------------------------------------------------------------------|-------------------|--------------------|
| 1     | P2*              | F: CACTGAAAATGCCTAGATGAG   | 55      | ~950     | tRNA <sup>Phe</sup> , rrnS, tRNA <sup>Val</sup>                                                                       | 0                 | MZ736693-MZ736708  |
|       |                  | R: CTAGGTGTAAACTAGRTGCTT   |         |          |                                                                                                                       |                   |                    |
| 2     | 12S <sup>#</sup> | F: AGACATAAAAACGTTAGGTC    | 60      | ~350     | rrnS, tRNA <sup>Val</sup>                                                                                             | 0                 |                    |
|       |                  | R: GCTTTGGTTCAAAGTGGTCA    |         |          |                                                                                                                       |                   |                    |
| 3     | P3*              | F: GCACGCACACACCGCCCGTCAC  | 55      | ~600     | rrnS, tRNA <sup>Val</sup> , rrnL                                                                                      | 0                 |                    |
|       |                  | R: CGCTTTCTTAATTGRTGGCTGC  |         |          |                                                                                                                       |                   |                    |
| 4     | P4*              | F: AGCCTGGTGATAGCTGGTTGTCC | 55      | ~650     | rrnL                                                                                                                  | 0                 |                    |
|       |                  | R: AAGCTCCATAGGGTCTTCTCGTC |         |          |                                                                                                                       |                   |                    |
| 5     | P5*              | F: CCGTGCAAAGGTAGCATAATC   | 55      | ~800     | rrnL, tRNA <sup>Leu</sup> , NADH1                                                                                     | 0                 |                    |
|       |                  | R: CCTAGNACTTTTCGTTCTNACT  |         |          |                                                                                                                       |                   |                    |
| 6     | P6*              | F: GTGGCAGAGCCCGGTAATTG    | 55      | ~950     | NADH1, tRNA <sup>Ile</sup>                                                                                            | 0                 |                    |
|       |                  | R: TTACTCTATCAAAGTAACTC    |         |          |                                                                                                                       |                   |                    |
| 7     | P7*              | F: TYCGAGCATCHTAYCCHCGAT T | 55      | ~800     | NADH1, tRNA <sup>Ile</sup> , tRNA <sup>Gln</sup> ,<br>tRNA <sup>Met</sup> , NADH2                                     | 0                 |                    |
|       |                  | R: TGGTTTAGBCCBCCTCAKCCYCC |         |          |                                                                                                                       |                   |                    |
| 8     | P8*              | F: CACTTYTGAGTNCCAGAAGT    | 55      | ~850     | NADH2, tRNA <sup>Trp</sup> , tRNA <sup>Ala</sup>                                                                      | 0                 |                    |
|       |                  | R: TAGGGTRTTTAGCTGTTAAC    |         |          |                                                                                                                       |                   |                    |
| 9     | P9*              | F: AGACCAAGAGCCTTCAAAGC    | 55      | ~650     | tRNA <sup>Trp</sup> , tRNA <sup>Ala</sup> , tRNA <sup>Asn</sup> ,<br>tRNA <sup>Cys</sup> , tRNA <sup>Tyr</sup> , COX1 | 0                 |                    |
|       |                  | R: GCTTCWACTATDGADGATGC    |         |          |                                                                                                                       |                   |                    |
| 10    | P10*             | F: GGNGGNTTYGGHAAAYTGACT   | 55      | ~750     | COX1                                                                                                                  | 1                 |                    |
|       |                  | R: GAARATRAAGCCTAGRGCTCA   |         |          |                                                                                                                       |                   |                    |

| S.No. | Primer | Sequence                    | Ta (°C) | Amplicon | Targeted genes                                                            | Polymorphic sites | Genbank accessions |
|-------|--------|-----------------------------|---------|----------|---------------------------------------------------------------------------|-------------------|--------------------|
| 11    | P11*   | F: TTYACHGTHGGAATAGAYGT     | 55      | ~800     | COX1, tRNA <sup>Ser</sup> , tRNA <sup>Asp</sup> ,<br>COX2                 | 0                 | MZ736693-MZ736708  |
|       |        | R: GCRTCTTGRAANCCTARTTG     |         |          |                                                                           |                   |                    |
| 12    | P12*   | F: CCCCCYAYWRYTGGTTTCAAGCCA | 55      | ~500     | tRNA <sup>Asp</sup> , COX2, tRNA <sup>Lys</sup> ,<br>ATP8                 | 0                 |                    |
|       |        | R: GTKGAYGTRTCTAGTTGYGGCAT  |         |          |                                                                           |                   |                    |
| 13    | P13*   | F: CAATGCTCHGARATYTYGG      | 55      | ~950     | COX2, tRNA <sup>Lys</sup> , ATP8,<br>ATP6, COX3                           | 1                 |                    |
|       |        | R: GANARDGCTCCYGTDAGNGGT    |         |          |                                                                           |                   |                    |
| 14    | P14*   | F: GCCTAYGTNTTYACYCTNCTAGT  | 55      | ~800     | ATP6, COX3, tRNA <sup>Gly</sup> ,<br>NADH3                                | 1                 |                    |
|       |        | R: TGATTGGAAGTCARYTGTAC     |         |          |                                                                           |                   |                    |
| 15    | P16*   | F: AGCYTGYGAAGCAGCACTAGG    | 55      | ~950     | tRNA <sup>Arg</sup> , NADH4L,<br>NADH4                                    | 0                 |                    |
|       |        | R: GCKGTRGCTCCTATRTARCTTCA  |         |          |                                                                           |                   |                    |
| 16    | P17*   | F: AGCTCHATYTGYYTHCGYCAA AC | 55      | ~700     | NADH4, tRNA <sup>His</sup> ,<br>tRNA <sup>Ser</sup> , tRNA <sup>Leu</sup> | 1                 |                    |
|       |        | R: CCAATTTTTTGGYTCCTAAGRCC  |         |          |                                                                           |                   |                    |
| 17    | P18*   | F: CCGAAAAAGYAYGCAAGAACTGC  | 55      | ~750     | tRNA <sup>Ser</sup> , tRNA <sup>Leu</sup> ,<br>NADH5                      | 0                 |                    |
|       |        | R: GCDGATTTCCDGTKGCDGCTA    |         |          |                                                                           |                   |                    |
| 18    | P19*   | F: GACGARCAGAYGCHAAAYACAGC  | 55      | ~700     | NADH5                                                                     | 1                 |                    |
|       |        | R: GTDAKTADDAGGGCTCAGGCG    |         |          |                                                                           |                   |                    |
| 19    | P20*   | F: GGMAGCCTNGCNYTAACAGG     | 55      | ~600     | NADH6                                                                     | 0                 |                    |
|       |        | R: AGTTTAATGGDHTDGGDGATTG   |         |          |                                                                           |                   |                    |
| 20    | P21*   | F: CCATAACTRTAYAAAGCHGCAA   | 55      | ~650     | NADH6, tRNA <sup>Glu</sup> , CYTB                                         | 3                 |                    |
|       |        | R: CCTCARAATGATATTTGKCCTCA  |         |          |                                                                           |                   |                    |
| 21    | P22*   | F: CAGGMCTATTCCTRGCHATAAC   | 55      | ~950     | CYTB, tRNA <sup>Thr</sup>                                                 | 1\$21             |                    |

| S.No.                         | Primer   | Sequence                   | Ta (°C) | Amplicon | Targeted genes              | Polymorphic sites | Genbank accessions     |
|-------------------------------|----------|----------------------------|---------|----------|-----------------------------|-------------------|------------------------|
| 22                            | P23*     | R: CCCTTYTCTGGTTTACAAGACC  | 55      | ~650     | tRNAThr, tRNAPro, CR        | 10                | MZ736693-MZ736708      |
|                               |          | F: CATCGGACAACACTAGCATCTAT |         |          |                             |                   |                        |
|                               |          | R: CCTGAAGWAAGAACCAGATG    |         |          |                             |                   |                        |
| 23                            | CRintF2# | F: GATTAATATTGCATAGTA      | 50      | ~500     | CYTB, tRNA-Thr, tRNA-Pro,CR | 5(3\$23)          |                        |
|                               | CRintR3# | R: AATAGTTAATAGAAAGGC      |         |          |                             |                   |                        |
| 24                            | CRF1#    | F: CATGCCAGTATTAGTGAC      | 50      | ~450     | tRNAPhe, CR                 | 6\$23             |                        |
|                               | CRR1#    | R: CAAGGTGTTGTTAGCTAC      |         |          |                             |                   |                        |
| <b>Phylogeography Primers</b> |          |                            |         |          |                             |                   |                        |
| 25                            | P10*     | F: GGNGGNTTYGGHAAAYTGACT   | 45      | 431      | COX1                        | 1                 | MZ771364-MZ771458      |
|                               | COXR#    | R: GTAGACTTCAAAATGACC      |         |          |                             |                   |                        |
| 26                            | ATP6#    | F: TCTAATACTTAATCGG        | 50      | 379      | ATP6, COX3                  | 2                 | MZ771934- MZ772028     |
|                               |          | R: CTTGGAATGTGCTTTCAC      |         |          |                             |                   |                        |
| 27                            | NADH4#   | F: CCAAACACCATGAAGTTA      | 50      | 262      | NADH4                       | 1                 | MZ771459- MZ771553     |
|                               |          | R: GATCATGAGAATGATGAC      |         |          |                             |                   |                        |
| 28                            | NADH5#   | F: AACAAATCTTCACACTTG      | 50      | 268      | NADH5                       | 1                 | MZ771554- MZ771648     |
|                               |          | R: ATAGGGTGGTGATTGCTC      |         |          |                             |                   |                        |
| 29                            | CYTB1#   | F: AAATCTCACCCACTAGTT      | 50      | 428      | CYTB                        | 2                 | MZ771649- MZ771743     |
|                               |          | R: TTTGTAATGACTGTAGCT      |         |          |                             |                   |                        |
| 30                            | CYTB2#   | F: CTACACGAAACAGGGTCC      | 50      | 338      | CYTB                        | 1                 | MZ771744 -<br>MZ771838 |
|                               |          | R: ATTGGCTTAGGGGTCGGA      |         |          |                             |                   |                        |
| 31                            | CRF1#    | F: CATGCCAGTATTAGTGAC      | 50      | 281      | CR                          | 7                 | MZ771839- MZ771933     |

| S.No. | Primer   | Sequence              | Ta (°C) | Amplicon | Targeted genes              | Polymorphic sites | Genbank accessions    |
|-------|----------|-----------------------|---------|----------|-----------------------------|-------------------|-----------------------|
|       | CRintR2# | R: ATACGCATGTTGACTGGA |         |          |                             |                   | MZ771839-<br>MZ771933 |
| 32    | CRintF2# | F: GATTAATATTGCATAGTA | 50      | 495      | CYTB, tRNA-Thr, tRNA-Pro,CR | 6                 |                       |
|       | CRintR3# | R: AATAGTTAATAGAAAGGC |         |          |                             |                   |                       |

\*Designed by Hassanin et al. 2011

# Designed in this study

§ Overlapping number of segregating sites with the primer name

**Additional file 1 Table S2:** Sample (both tissue and dung) of Indian rhinos used in this study. A total of 111 individual rhino samples (72 tissue and 39 dung samples, respectively) were used in this study. Out of the 72 tissue samples, 16 samples representing different parks were used to generate the whole mitogenome data.

| State         | Protected areas             | Total tissue samples <sup>a</sup> | Tissue used for whole mitogenome data <sup>b</sup> | Dung collected | Dung used for phylogeography <sup>c</sup> |
|---------------|-----------------------------|-----------------------------------|----------------------------------------------------|----------------|-------------------------------------------|
| Uttar Pradesh | Dudhwa National Park        | 4                                 | 2                                                  | 13             | 6                                         |
| West Bengal   | Gorumara National Park      | 2                                 | 2                                                  | 18             | 8                                         |
|               | Jaldapara National Park     | 4                                 | 2                                                  | 15             | 6                                         |
| Assam         | Manas National Park         | 3                                 | 1                                                  | 22             | 9                                         |
|               | Pobitora Wildlife Sanctuary | 9                                 | 2                                                  | 5              | 1                                         |
|               | Orang National Park         | 3                                 | 3                                                  | 15             | 9                                         |
|               | Kaziranga National Park     | 46                                | 3                                                  | 0              | 0                                         |
| Bihar*        | Valmiki National Park       | 1                                 | 1                                                  | NA             | NA                                        |
|               | <b>Total</b>                | <b>72</b>                         | <b>16</b>                                          | <b>88</b>      | <b>39</b>                                 |

\*Reference sample from non-rhino bearing area

<sup>a</sup> Total number of tissue samples used in this study. Out of 72, 16 were used for mitogenome data generation as population-wise details given in next column.

<sup>b</sup> Details of representative tissue samples to generate whole mitogenome data for identification of polymorphic sites across Indian rhino populations

<sup>c</sup> Dung details of identified rhino individuals representing six parks to ensure spatial coverage for phylogeography analysis. In total 111 samples were used for this work consisting of 72 tissues and 39 dungs.

**Additional file 1 Table S3:** Mitogenome organization in *Rhinoceros unicornis*. Codons respective to each tRNA are mentioned in parenthesis.

| Genes                     | Position |       | Gene length | Spaces/<br>overlap | Strand | Codons |      |
|---------------------------|----------|-------|-------------|--------------------|--------|--------|------|
|                           | Start    | Stop  |             |                    |        | Start  | Stop |
| tRNA <sup>Phe</sup> (GAA) | 1        | 69    | 69          | 0                  | H      |        |      |
| rrnS                      | 70       | 1041  | 972         | -1                 | H      |        |      |
| tRNA <sup>Val</sup> (TAC) | 1041     | 1107  | 67          | 0                  | H      |        |      |
| rrnL                      | 1108     | 2681  | 1574        | 3                  | H      |        |      |
| tRNA <sup>Leu</sup> (TAA) | 2685     | 2759  | 75          | 2                  | H      |        |      |
| NADH1                     | 2762     | 3718  | 957         | -1                 | H      | ATG    | TAA  |
| tRNA <sup>Ile</sup> (GAT) | 3718     | 3786  | 69          | -3                 | H      |        |      |
| tRNA <sup>Gln</sup> (TTG) | 3784     | 3856  | 73          | 2                  | L      |        |      |
| tRNA <sup>Met</sup> (CAT) | 3859     | 3927  | 69          | 0                  | H      |        |      |
| NADH2                     | 3928     | 4971  | 1044        | -2                 | H      | ATA    | TAG  |
| tRNA <sup>Trp</sup> (TCA) | 4970     | 5037  | 68          | 5                  | H      |        |      |
| tRNA <sup>Ala</sup> (TGC) | 5043     | 5111  | 69          | 1                  | L      |        |      |
| tRNA <sup>Asn</sup> (GTT) | 5113     | 5185  | 73          | 2                  | L      |        |      |
| OL                        | 5188     | 5217  | 30          | -1                 | H      |        |      |
| tRNA <sup>Cys</sup> (GCA) | 5217     | 5282  | 66          | 0                  | L      |        |      |
| tRNA <sup>Tyr</sup> (GTA) | 5283     | 5349  | 67          | 1                  | L      |        |      |
| COX1                      | 5351     | 6895  | 1545        | -3                 | H      | ATG    | TAA  |
| tRNA <sup>Ser</sup> (TGA) | 6893     | 6961  | 69          | 11                 | L      |        |      |
| tRNA <sup>Asp</sup> (GTC) | 6973     | 7039  | 67          | 0                  | H      |        |      |
| COX2                      | 7040     | 7723  | 684         | 3                  | H      | ATG    | TAA  |
| tRNA <sup>Lys</sup> (TTT) | 7727     | 7793  | 67          | 1                  | H      |        |      |
| ATP8                      | 7795     | 7998  | 204         | -43                | H      | ATG    | TAA  |
| ATP6                      | 7956     | 8636  | 681         | -1                 | H      | ATG    | TAA  |
| COX3                      | 8636     | 9420  | 785         | -1                 | H      | ATG    | TAA  |
| tRNA <sup>Gly</sup> (TCC) | 9420     | 9488  | 69          | -3                 | H      |        |      |
| NADH3                     | 9486     | 9835  | 350         | 0                  | H      | ATA    | TAA  |
| tRNA <sup>Arg</sup> (TCG) | 9836     | 9905  | 70          | 0                  | H      |        |      |
| NADH4L                    | 9906     | 10202 | 297         | -7                 | H      | ATG    | TAA  |
| NADH4                     | 10196    | 11573 | 1378        | 0                  | H      | ATG    | TAA  |
| tRNA <sup>His</sup> (GTG) | 11574    | 11642 | 69          | 0                  | H      |        |      |
| tRNA <sup>Ser</sup> (GCT) | 11643    | 11701 | 59          | 1                  | H      |        |      |
| tRNA <sup>Leu</sup> (TAG) | 11703    | 11772 | 70          | -9                 | H      |        |      |
| NADH5                     | 11764    | 13593 | 1830        | -17                | H      | ATA    | TAA  |
| NADH6                     | 13577    | 14101 | 525         | 3                  | L      | ATG    | TAA  |
| tRNA <sup>Glu</sup> (TTC) | 14105    | 14173 | 69          | 4                  | L      |        |      |
| CYTB                      | 14178    | 15317 | 1140        | 0                  | H      | ATG    | AGA  |
| tRNA <sup>Thr</sup> (TGT) | 15318    | 15386 | 69          | 1                  | H      |        |      |
| tRNA <sup>Pro</sup> (TGG) | 15388    | 15453 | 66          | 268                | L      |        |      |
| CR                        | 15454    | 16828 | 1388        | /                  | H      |        |      |

**Additional file 1 Table S4:** Comparative analysis results of genetic diversity indices among five extant rhino species

| Mitochondrial genes | African rhino |                |        | Sumatran rhino |                |        | Javan rhino |                |        | Indian rhino |                |        |
|---------------------|---------------|----------------|--------|----------------|----------------|--------|-------------|----------------|--------|--------------|----------------|--------|
|                     | S             | H <sub>d</sub> | $\pi$  | S              | H <sub>d</sub> | $\pi$  | S           | H <sub>d</sub> | $\pi$  | S            | H <sub>d</sub> | $\pi$  |
| <b>rrnS</b>         | 51            | 0.67           | 0.0352 | 0              | 0              | 0      | 1           | 0.53           | 0.0006 | 0            | 0              | 0      |
| <b>rrnL</b>         | 68            | 0.67           | 0.0289 | 7              | 0.85           | 0.0014 | 13          | 0.73           | 0.0037 | 0            | 0              | 0      |
| <b>ATP6</b>         | 64            | 0.67           | 0.0627 | 5              | 0.69           | 0.6857 | 4           | 0.80           | 0.8000 | 1            | 0.50           | 0.5000 |
| <b>ATP8</b>         | 12            | 0.67           | 0.0392 | 1              | 0.42           | 0.0021 | 2           | 0.60           | 0.0043 | 0            | 0              | 0      |
| <b>COX1</b>         | 100           | 0.67           | 0.0431 | 12             | 0.84           | 0.0033 | 11          | 0.93           | 0.0029 | 1            | 0.50           | 0.0003 |
| <b>COX2</b>         | 49            | 0.67           | 0.0478 | 2              | 0.51           | 0.0008 | 4           | 0.73           | 0.7333 | 0            | 0              | 0      |
| <b>COX3</b>         | 69            | 0.67           | 0.0587 | 3              | 0.54           | 0.0008 | 3           | 0.60           | 0.0018 | 1            | 0.13           | 0.0002 |
| <b>CYTB</b>         | 98            | 0.67           | 0.0573 | 14             | 0.88           | 0.0050 | 8           | 0.73           | 0.0036 | 3            | 0.57           | 0.0011 |
| <b>NADH1</b>        | 55            | 0.67           | 0.0384 | 6              | 0.78           | 0.0027 | 4           | 0.73           | 0.0020 | 0            | 0              | 0      |
| <b>NADH2</b>        | 78            | 0.67           | 0.0499 | 7              | 0.89           | 0.0022 | 6           | 0.73           | 0.0029 | 0            | 0              | 0      |
| <b>NADH3</b>        | 28            | 0.67           | 0.0540 | 5              | 0.81           | 0.0054 | 1           | 0.33           | 0.0010 | 0            | 0              | 0      |
| <b>NADH4</b>        | 108           | 0.67           | 0.0523 | 14             | 0.73           | 0.0042 | 7           | 0.80           | 0.0023 | 1            | 0.33           | 0.0002 |
| <b>NADH4L</b>       | 27            | 0.67           | 0.0606 | 2              | 0.26           | 0.0009 | 2           | 0.53           | 0.0036 | 0            | 0              | 0      |
| <b>NADH5</b>        | 144           | 0.67           | 0.0527 | 14             | 0.81           | 0.0032 | 11          | 0.73           | 0.0031 | 1            | 0.50           | 0.0003 |
| <b>NADH6</b>        | 51            | 0.67           | 0.0648 | 1              | 0.42           | 0.0008 | 4           | 0.73           | 0.0042 | 0            | 0              | 0      |
| <b>tRNA</b>         | 65            | 0.67           | 0.0290 | 7              | 0.82           | 0.0016 | 0           | 0              | 0      | 1            | 0.33           | 0.0002 |
| <b>CR</b>           | 185           | 0.67           | 0.1395 | 31             | 0.93           | 0.0108 | 21          | 0.93           | 0.0118 | 9            | 0.85           | 0.0045 |

Additional file 1 Table S5: Details of the variable sites based on concatenated sequence of 2531bp of Indian one horned rhino mtDNA haplotypes.

| Clade         | Gene     |    | COX1 | ATP6  | COX3 | NADH4  | NADH5  | CYTB   |        |         | CR |   |   |   |         |   |   |   |   |   |   |   |   |   |
|---------------|----------|----|------|-------|------|--------|--------|--------|--------|---------|----|---|---|---|---------|---|---|---|---|---|---|---|---|---|
|               | Primers  |    | P10F | ATP6F |      | NADH4F | NADH5F | CYTBF1 | CYTBF2 | CRF1    |    |   |   |   | CRintF2 |   |   |   |   |   |   |   |   |   |
|               |          |    | COXR | ATP6R |      | NADH4R | NADH5R | CYTBR1 | CYTBR2 | CRintR2 |    |   |   |   | CRintR3 |   |   |   |   |   |   |   |   |   |
|               | Position |    | 5    | 8     | 8    | 1      | 1      | 1      | 1      | 1       | 1  | 1 | 1 | 1 | 1       | 1 | 1 | 1 | 1 | 1 | 1 | 1 | 1 | 1 |
| Haplotype     |          | N  |      |       |      | 0      | 9      | 5      | 5      | 2       | 2  | 9 | 6 | 5 | 7       | 3 | 0 | 0 | 6 | 5 | 4 | 8 | 4 |   |
| Uttar Pradesh | H1       | 10 | T    | G     | T    | G      | A      | G      | A      | G       | C  | T | T | G | C       | T | G | A | T | C | G | C | T |   |
| West Bengal   | H2       | 20 | *    | *     | *    | A      | *      | A      | G      | A       | T  | * | C | * | T       | * | A | * | * | * | * | T | C |   |
| Assam         | H3       | 1  | *    | *     | *    | A      | *      | *      | *      | *       | T  | C | * | A | *       | * | A | * | * | * | * | * | C |   |
|               | H4       | 1  | *    | *     | *    | A      | *      | *      | *      | *       | T  | C | * | * | *       | C | A | * | * | * | * | * | C |   |
|               | H5       | 1  | C    | T     | *    | A      | G      | *      | G      | *       | T  | C | * | A | *       | * | A | G | * | * | * | T | * |   |
|               | H6       | 1  | *    | *     | C    | A      | *      | *      | *      | *       | T  | C | * | A | *       | * | A | G | * | * | * | T | * |   |
|               | H7       | 2  | C    | T     | *    | A      | G      | *      | G      | *       | T  | * | * | * | *       | C | A | * | * | * | * | * | C |   |
|               | H8       | 26 | C    | T     | *    | A      | G      | *      | *      | *       | T  | C | * | A | *       | * | A | G | * | * | * | T | * |   |
|               | H9       | 1  | C    | T     | *    | A      | G      | C      | *      | A       | T  | C | * | A | *       | * | A | G | * | * | * | T | * |   |
|               | H10      | 1  | *    | *     | C    | A      | *      | *      | *      | *       | T  | * | C | * | *       | * | A | * | * | T | * | T | * |   |
|               | H11      | 5  | C    | T     | *    | A      | G      | *      | *      | A       | T  | C | * | A | *       | * | A | G | * | * | * | T | * |   |
|               | H12      | 1  | *    | *     | C    | A      | *      | *      | *      | A       | T  | * | C | * | *       | * | A | * | * | T | * | T | * |   |
|               | H13      | 1  | *    | *     | *    | A      | *      | *      | *      | A       | T  | * | * | * | *       | * | A | * | * | * | * | * | C |   |
|               | H14      | 1  | C    | T     | *    | A      | G      | *      | *      | *       | T  | C | * | A | *       | * | A | G | * | * | * | * | * |   |
|               | H15      | 1  | *    | *     | *    | A      | *      | *      | *      | *       | T  | * | * | * | *       | * | A | * | C | * | * | * | T | * |
|               | H16      | 2  | *    | T     | *    | A      | G      | *      | *      | *       | T  | C | * | A | *       | * | A | G | * | * | * | T | * |   |
|               | H17      | 2  | C    | *     | C    | A      | *      | *      | *      | *       | T  | * | C | * | *       | * | A | * | C | T | A | T | * |   |
|               | H18      | 3  | *    | *     | C    | A      | *      | *      | *      | *       | T  | * | C | * | *       | * | A | * | C | T | A | T | * |   |
|               | H19      | 2  | *    | *     | *    | A      | *      | *      | *      | *       | T  | * | * | * | *       | C | A | * | * | T | A | T | * |   |
|               | H20      | 10 | *    | *     | *    | A      | *      | *      | *      | *       | T  | * | * | * | *       | C | A | * | * | * | * | * | C |   |
|               | H21      | 3  | C    | *     | *    | A      | *      | *      | *      | *       | T  | * | * | * | *       | C | A | G | * | * | * | T | * |   |
|               | H22      | 2  | *    | *     | *    | A      | *      | *      | *      | *       | T  | * | * | * | *       | C | A | G | * | * | * | T | * |   |
|               | H23      | 3  | C    | *     | *    | A      | *      | *      | *      | *       | T  | * | * | * | *       | C | A | * | * | * | * | * | C |   |
|               | H24      | 1  | *    | *     | *    | A      | G      | *      | *      | *       | T  | * | * | * | *       | C | A | G | * | * | * | * | * |   |
|               | H25      | 1  | C    | T     | *    | A      | *      | *      | *      | *       | T  | C | * | A | *       | * | A | G | * | * | * | T | * |   |
|               | H26      | 4  | C    | T     | *    | A      | G      | C      | *      | *       | T  | C | * | A | *       | * | A | G | * | * | * | T | * |   |
|               | H27      | 1  | *    | *     | C    | A      | *      | C      | *      | *       | T  | C | * | A | *       | * | A | * | * | T | * | T | * |   |
|               | H28      | 1  | C    | *     | T    | A      | *      | *      | *      | *       | T  | C | * | A | *       | * | A | G | * | * | * | T | * |   |
|               | H29      | 1  | C    | T     | T    | A      | G      | *      | *      | *       | T  | * | * | * | *       | C | A | * | * | * | * | * | C |   |
|               | H30      | 1  | *    | T     | T    | A      | G      | *      | *      | *       | T  | * | * | * | *       | C | A | * | * | * | * | * | C |   |

Positions of nucleotides corresponds to whole mitogenome of Indian one horned rhino

N number of samples

Red nucleotides represents the clade specific SNP
