# Supplementary material for: Consideration of genetic variation and evolutionary history in future conservation of Indian one-horned rhinoceros (Rhinoceros unicornis)
Source: PubMed Central journal article supplement (PMC9301832; doi:10.1186/s12862-022-02045-2), 2022-07-20

## **Additional file 2 legends**

**Additional file 2 Fig. S1:** Whole mitogenome organisation and annotation of *Rhinoceros unicornis*.

**Additional file 2 Fig. S2:** Gene-wise comparative analyses of polymorphism indices ( $S$ ,  $Hd$  and  $\pi$ ) for all extant rhino species.

**Additional file 2 Fig. S3:** Estimation of mitogenome mutation rate for Indian rhino using Caballine (Zebra, Donkey, Asiatic Wild Ass and Horse) as outgroup. Internal node calibration points are presented in italics (bold). Estimated node ages and branch mutation rates with available reference in literature is marked with \* (Fernando et al., 2006; Steiner et al., 2011; Steiner et al., 2017; Liu et al., 2021).

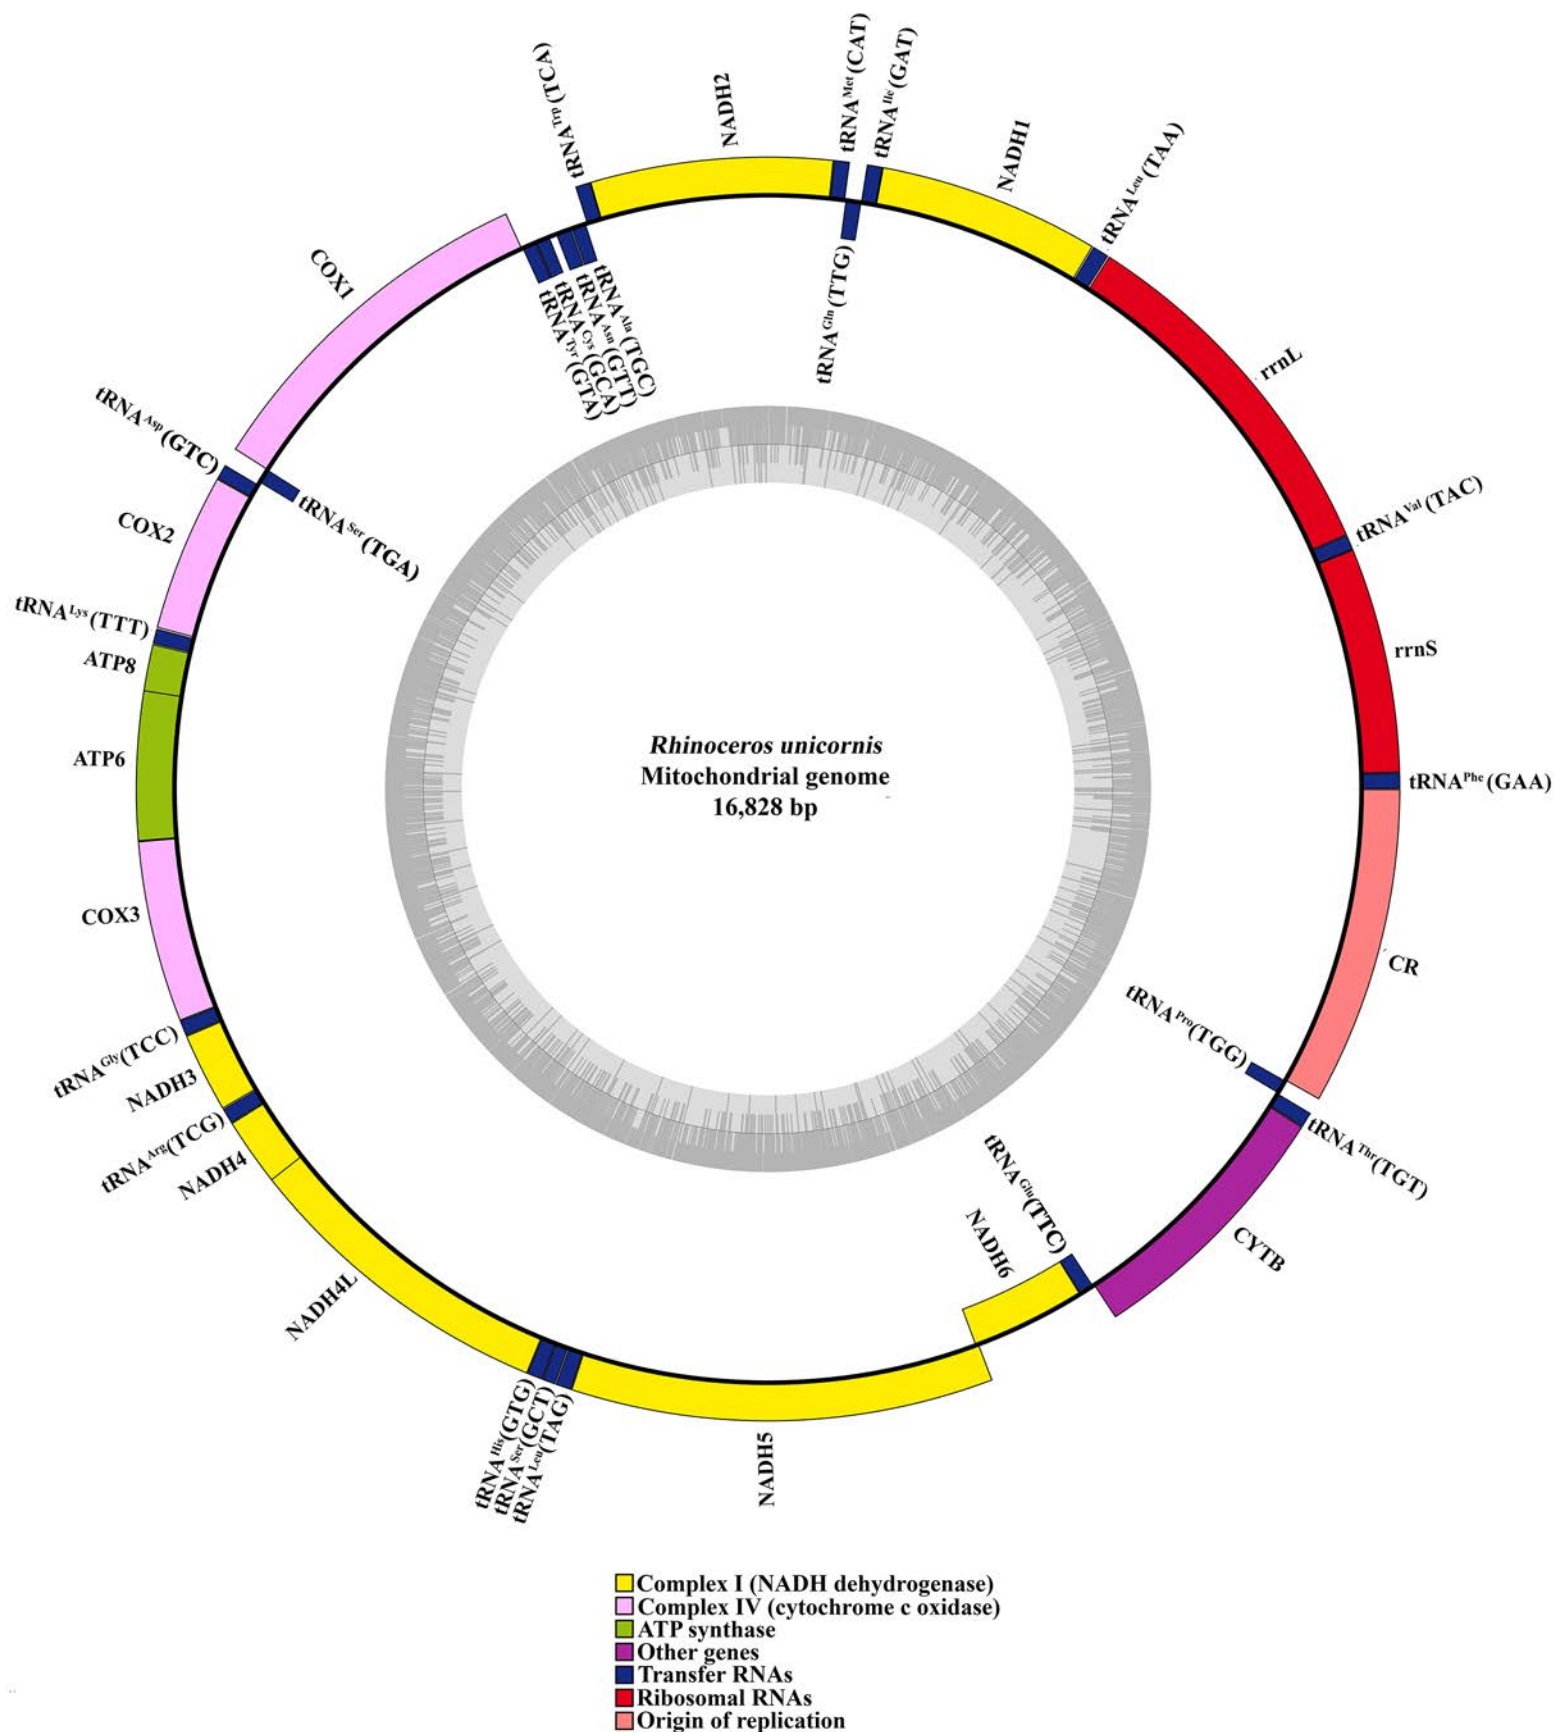

Additional file 2 Fig. S2

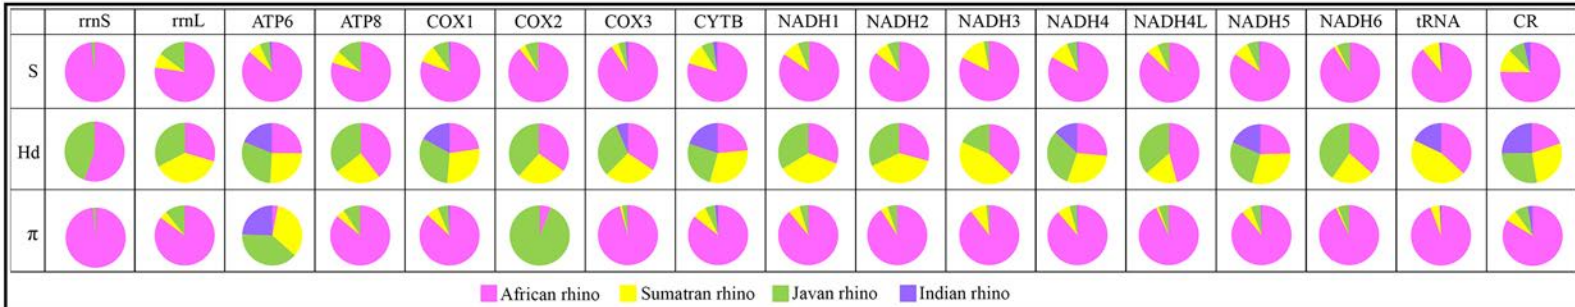

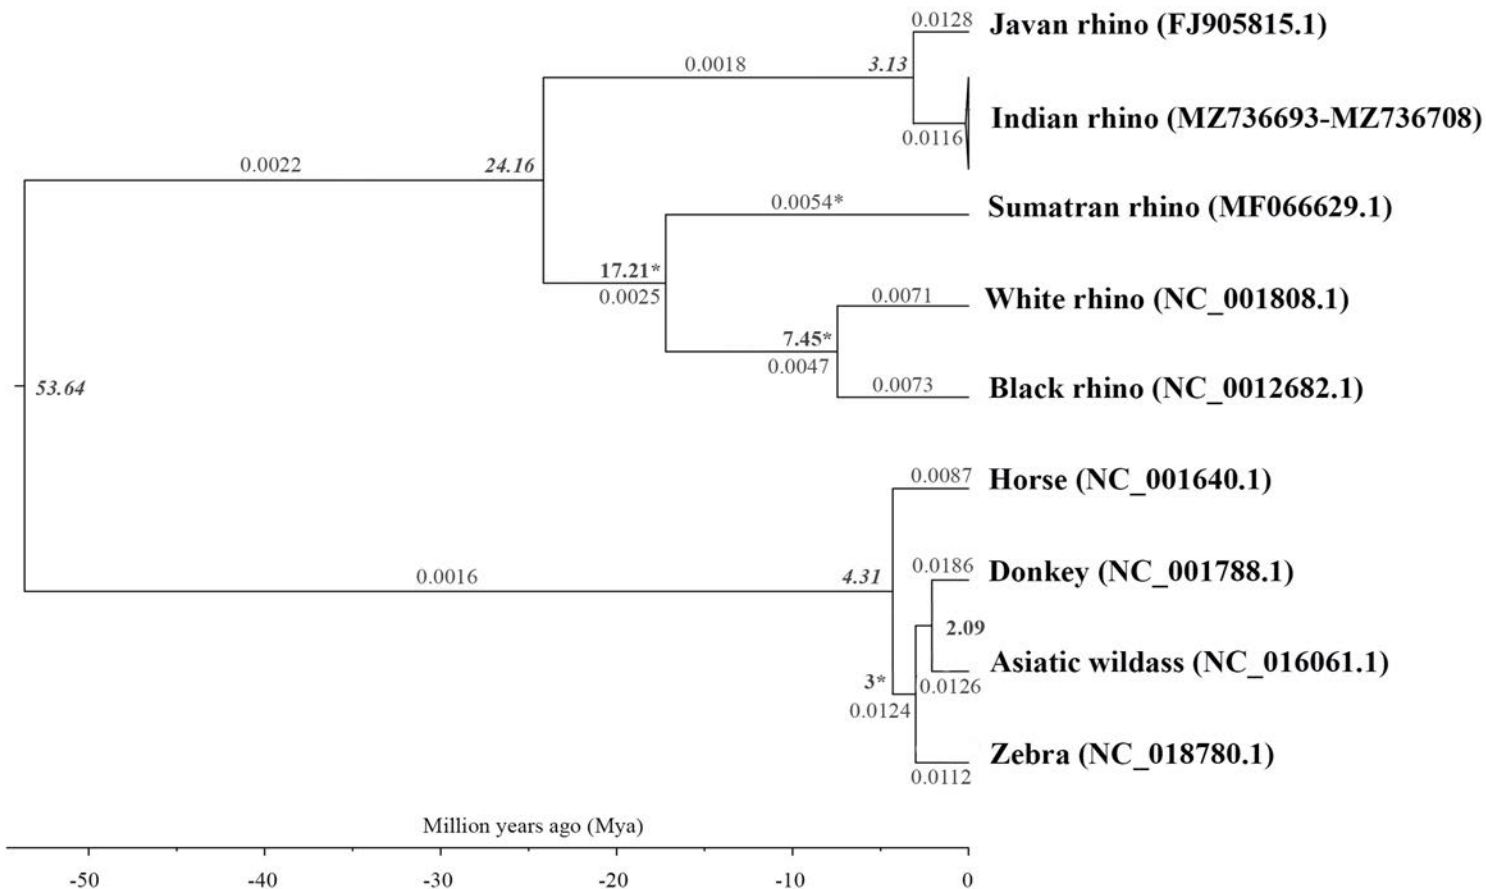

Supplement: 12862_2022_2045_MOESM2_ESM.pdf [file 12862_2022_2045_MOESM2_ESM.pdf]
